# Supplementary material for: Personalized Chemotherapy Profiling Using Cancer Cell Lines from Selectable Mice
Source: Oxford University Press journal article supplement (doi:10.1158/1078-0432.ccr-12-2127), 2013-01-23
Supplement: 10780432ccr122127-sup-tab1.xlsx [file 10780432ccr122127-sup-tab1.xlsx]

## Sheet: All Information - 4-22-2011 ANK
Drugs	Growth inhibition (%) (HK, 2010)	FDA (HK, 2010)	Dosage Form/Route (ANK 4/22/11)	Strength (ANK 4/22/11)	Marketing Status (ANK 4/22/11)
Gemcitabine (hydrochloride)	100	FDA approved	Injectable	Multiple	Prxn
Pristimerin	100
Tubercidin	100
Quinacrine	100
Convallatoxin	100
Brij	100
Myrrh oil	100
Acriflavine	99.8
Gambogic acid	99.8
Brilliant Blue	99.8
Actinomycin D (dactinomyocin - also below on this list)	99.7	FDA approved	Injectable	0.5mg/vial	Prxn
Celastrol	99.7
Aminacrine	99.7
Triple dye	99.7
Aklavine hydochloride	99.7
Aminacrine	99.7
Doxorubicin (hydrochloride)	99.6	FDA approved	Injectable	Multiple	Prxn
Chromomycin A3	99.6
Actinomycin C	99.6
Prazosin (hydrochloride)	99.5	FDA approved	Capsule, oral	1-5mg (multiple)	Prxn
Acrisorcin	99.5	FDA approved	Cream, topical	2mg/g	Discontinued
Mitoxantrone hydrochloride	99.5	FDA approved	Injectable	Multiple	Prxn
Tilorone Analog R 9536-DA	99.5
Emetine	99.5
Malachite green	99.5
Tetrandrine	99.4
Triptonide	99.4
Camptothecin	99.4
Dactinomycin	99.3	FDA approved	Injectable	0.5mg/vial	Prxn
Verteporfin	99.3	FDA approved	Injectable	15mg/vial	Prxn
Gentian violet	99.2	FDA approved	Suppository/tampon, vaginal	5mg	Discontinued
Dithiazanine iodide	99.2
Cantharidin	99.2
Anisomycin	99.2
Proflavine hemisulfate salt hydrate	99.1
Brilliant green	99.1
Cetyltrimethyl	99.1
Cetylpyridinium	99
Acetyldigitoxin	99	FDA discontinued	Tablet, oral	0.1mg	Discontinued
Tolonium chloride	98.9
Rutilantin	98.9
Strophanthin K	98.9
Thonzonium bromide	98.8	FDA approved	Suspension, oral/otic	0.5-10mg/ml	Prxn
Cytarabine	98.8	FDA approved	Injectable	20-500mg/vial	Prxn
Ancitabine hydrochloride	98.8
Daunorubicin (hydrochloride)	98.7	FDA approved	Injectable	5-20mg/vial	Prxn
Quinaldine blue	98.7
Nigericin sodium	98.3
Ipecac syrup	98.3
Puromycin	98.3
O-Phenanthroline	98.2
Triptolide	98.1
Strophanthidin	98
Geldanamycin	98
Gramicidin A	97.9	FDA approved	Drops, cream (ophthalmic, topical)	Multiple	Prxn/Discontinued
Idarubicin (hydrochloride)	97.9	FDA approved	Injectable	1mg/ml	Prxn
10-hydroxycamptothecin	97.8
Topotecan (hydrochloride)	97.7	FDA approved	Sol'n/IV, capsule/oral	1mg/ml for sol'n	Prxn
Cetylpyridinium bromide monohydrate	97.7	FDA approved	Couldn't find
Pyrivinium pamonate (Pyridinium pamoate)	97.6	FDA discontinued	Couldn't find
Rapamycin (rapamune/sirolimus)	97.5	FDA approved	oral - tablet/sol'n	0.5-2mg or 1mg/ml	Prxn
Astemizole	97.3
Mebeverine hydrochloride	97.1
Azure A	97.1
Cephradine	97.1	FDA discontinued	Capsule/oral	250-500mg	Discontinued
Cyclocytidine HCL	97
Cetrimonium bromide	97
Methylglyoxal bis-(guanylhydrazone) dihydrochloride	96.8
Podophyllum resin	96.8
Peruvoside	96.8
Radicicol	96.8
Methyl violet 2B	96.7
Nile blue A	96.6
Neocuproine	96.5
Brefeldin A	96.1
Plicamycin	96	FDA discotiued	Injectable	2.5mg/vial	Discontinued
Juniper tar	95.8
Stearyltrimethylammonium chloride	95.7
Mycophenolic acid	95.6	FDA approved	Tablet, oral	180-360mg	Prxn
Ouabain	95.6
Diphenylcyclopropenone	95.4
Digitoxin	95.1	FDA discontinued	Injectable	0.2mg/ml	Discontinued
Digitonin	94.9
Valinomycin	94.9
Cycloheximide	94.8
Digoxin	94.7	FDA approved	Injectable, tablet/oral	0.25mg/ml	Prxn
Bemegride (3-methyl-3-ethylglutarimide)	94.4
Chlormadinone acetate	94.1	FDA approved	Discontinued for safety reasons (http://www.fda.gov/downloads/Drugs/GuidanceComplianceRegulatoryInformation/Guidances/ucm124736.pdf)
Cymarin	93.9
Lasalocid sodium	93.5
Periplocymarin	93.5
N(g)-nitro-L-arginine	93.3
Proscillaridin A	93.2
Birch tar oil rectified	92.7
Staurosporine	92.7
Amifostine	92.5	FDA approved	injectable	500mg/vial	Prxn
Benzododecinium chloride	92.3
Pyrogallin	92.2
Iopanoic acid	92.2	FDA discontinued	tablet/oral	500mg
Lanatoside C	92.1
Nerifolin	92.1
Ethacridine lactate	91.9
Labetalol (hydrochloride)	91.8	FDA approved	tablet/oral, injectable	Multiple, 5mg/ml
Triciribine	91.8
Hexadimethrine bromide	91.2
Tilorone dihydrochloride	91
Pyronin Y	90.4
Salinomycin sodium	90.4
Colchiceine (Colchicine)	90.3	FDA approved	Tablet/oral	0.6mg	Prxn
Thiostrepton	90.3
Omeprazole	89.9	FDA approved	Tablet/oral	20mg=OTC, 40mg=Prxn	Prxn & OTC
Pyrithione zinc	89.6	FDA discontinued	Lotion/topical	0.003	Discontinued	*Head&Shoulders Conditioner
Cladribine	88.9	FDA approved	Injectable	1mg/ml	Prxn
Nicotinic Acid (Niacin)	88.2	FDA approved	tablet/oral	500mg-1g	Prxn
Amantadine hydrochloride	87.9	FDA approved	capsule/syrup/oral	100mg, 10mg/ml	Prxn
Epirubicin (hydrochloride)	87.7	FDA approved	injectable/injection/IV	50mg/vial, 2mg/ml, multiple	Prxn
3-aminopropanesulphonic acid	86.9
Domiphen bromide	86.9
Safranin O	86.6
Broxuridine	86.6
Dichlorodiphenyltrichlorethane	86.3
Crassin acetate	86.3
Hydroxyitraconazole (itraconazole)	86.2	FDA approved	capsule/tablet/oral	100mg, 200mg	Prxn
Homidium brimide	85.5
Vinorelbine tartrate	85.4	FDA approved	injectable	10mg/ml	Prxn
Chlorquinaldol	85.3
Monensin sodium	85
N-Ethylmaleimide	84.3
Rifamycin sv	84.1
Teniposide	83.9	FDA approved	injectable	10mg/ml	Prxn
Retinol	83.9
Dopamine hydrochloride	83.6	FDA approved	injectable	40-160mg/ml	Prxn
Basic fuchsin hydrochloride	83.4
Ketoprofen	83.2	FDA approved	capsule/tablet/oral	12.5-200mg	Prxn
Podofilox	82.7	FDA approved	sol'n/topical	0.005	Prxn
Gallamine triethiodide	82.7	FDA discontinued	injectable	20-100mg/ml	Discontinued
Methylene blue hydrate	82.5
Chlorhexidine (gluconate)	82.3	FDA approved	Sol'n/dental, sponge/topical	0.12%, 2-4%	OTC, Prxn
7-chloroethyltheophylline	81.9
Tomatine	81.8
Alexidine hydrochloride	81.4
Methylbenzethonium chloride	80.9
Irinotecan hydrochloride trihydrate (irinotecan hydrochloride)	80.7	FDA approved	injectable	20mg/ml (multiple)	Prxn
Alprenolol	80.7
Quercitrin	80.4
Diaziquone	80.4
Phenylmercuric acetate	80.2
Metoprolol tartrate	80	FDA approved	injectable, tablet/oral	1mg/ml, 25-50mg	Prxn
Mebhydrolin naphthalene sulfonate	79.5
Fluvastatin sodium	79.4	FDA approved	tablet, extended release oral	80mg	Tentative approval
Taxol (paclitaxel brand name)	79	FDA approved	injectable	6mg/ml	DISCONTINUED - **Federal Register determination that product was not discontinued or withdrawn for safety or efficacy reasons**
Vincristine sulfate	78.6	FDA approved	injectable	1mg/ml	Prxn
Aclarubicin	78.3
Coal tar	78.2
Chloroquine diphosphate salt (chloroquine phosphate)	78	FDA approved	tablet/oral	150mg base	Prxn
Althiazide	77.6
Thiomerosal	77.4
Patulin	77.3
Lipoic acid	76.7
Lawsone	76.4
Tolbutamide	76.2	FDA approved	tablet/oral	500mg	Prxn
Tilorone	75.9
Tioxolone	75.9
Docetaxel	75.7	FDA approved	injectable	10mg/ml	Prxn
Nogalamycin	75.4
Estriol benzyl ether	75.2
Trichlormethine	75.2
Vinblastine sulfate	75.1	FDA approved	injectable	1mg/ml	Prxn
Tyrothericin	75
Suprofen methyl ester (suprofen)	74.9	FDA approved	Opthalmic drops/sol'n	0.01	Discontinued
Nefopam	74.8
Colchicine	74.5	FDA approved	tablet/oral	0.6mg	Prxn
Lithium acetate	74.2
Estradiol-3-sulfate	74
Thiram	73.6
Pyrromycin	73.6
Silibinin	73.6
Nalbuphine (hydrochloride)	73.5	FDA approved	injectable	10-20mg/ml	Prxn
Fenspiride	73.1
Sulfachlorpyridazine	73
Cinnamon oil	72.9
Vindesine	72.9
Titanium(IV) bis(ammonium lactato)dihydroxide	72.6	(titanium dioxide is OTC cream/topical used by Loreal)
Demecolcine	72.4
Ciclopirox olamine	71.6	FDA approved	Topical - Cream/Sol'n/Suspension/Gel/Shampoo	1-8%	Prxn
Oxyphencyclimine	71.6	FDA discontinued	Tablet/oral	10mg/ml	Discontinued
Naltrexone hydrochloride	71.5	FDA approved	Tablet/oral	50mg	Prxn
Dipyridamole	71.4	FDA approved	Tablet/oral and injectable	25-75mg and 5mg/ml	Prxn
Thiacetazone	71.4
Vigabatrin	71.3	FDA approved	Oral - tablet/sol'n	500mg	Prxn
Nelfinavir mesylate	71.1	FDA approved	Oral - tablet/powder	50mg base	Prxn
Octopamine hydrochloride	71.1
Mechlorethamine HCL	71	FDA approved	injectable	10mg/vial	Prxn
DETC	70.5
Carboplatin	70	FDA approved	injectable (injection/IV infusion)	Multiple	Prxn
Paclitaxel (Abraxane) (Taxol is discontinued)	70	FDA approved	IV/infusion	100mg/vial	Prxn
Carmustine	69.8	FDA approved	injectable	100mg/vial	Prxn
Gitoxin	69.6
Perhexilline maleate	69.3
Fennel oil	69.3
Antazoline	69	FDA approved	Opthalmic drops/sol'n	0.05-5%	Discontinued
Acetylglucosamine	68
Succinylsulfathazole	67.8
Retinyl acetate	67.7
Shikonin	67.6
Thiamphenicol	67.4
Acridine yellow	67.3
Guaiacwood oil	67.2
Cimicifugin	66.9
Ditiocarb	66.5
Oxybendazole	66.4
Adenosine-5'-diphosphate Disodium salt	66.4
Dapsone	66.3	FDA approved	tablet/oral	25-100mg	Prxn
Ribavirin	65.9	FDA approved	oral - tablet/capsule (oral sol'n has tentative approval)	200mg	Prxn
5-Methyl-2'deoxycytidine	65.8
Trimilpramine maleate (trimipramine maleate)	65.5	FDA approved	oral/capsule	Multiple	Prxn
Felbamate	65.5	FDA approved	oral - tablet/suspension	400-600mg and 120mg/ml	Prxn
Methyl 7-deshydroxypyrogallin-4-carboxylate	65.4
Satraplatin	65.3
Phenylhydrazine	64.6
Fenbendazole	63.6
5-azacytidine	63.6
Ivermectin	63.3	FDA approved	tablet/oral	3mg/ml	Prxn
Ipratroprium bromide (ipratropium bromide)	62.9	FDA approved	inhaled solution and nasal spray	0.02% and 0.021mg/spray	Prxn
Methylbenzethonium chloride	62.7
Croton oil	62.6
Etoposide	62.1	FDA approved	oral/capsule and injectable	50mg and 20mg/ml	Prxn
Thymidine 5'-monophosphate	62.1
Miltefosine	62.1
Carbinoxamine (maleate)	61.8	FDA approved	oral - tablet/solution	4mg and 0.8mg/ml	Prxn
Prochlorperazine edisylate	61.5	FDA approved	injectable and oral - concentrate/syrup	5mg/ml	Prxn
Pararosaniline pamonete	61.5
Pneumococcal 7-valent conjugate vaccine (Prevnar)	60.6	FDA approved	Injectable
Amodiaquine	60.3	FDA approved	tablet/oral	200mg base	Discontinued
Mercaptopurine	60.2	FDA approved	tablet/oral	50mg	Prxn
Anisotropine methylbromide	59.6	FDA discotiued	tablet/oral	50mg	Discontinued
Niguldipine	59.5
Clofazimine	59.4	FDA approved	Capsule/oral	50mg	Prxn
Curcumin	59
Metrifonate	59
Doxepin hydrochloride	58.2	FDA approved	oral - capsule and concentrate	Multiple	Prxn
Galantamine hydrobromide	58.2	FDA approved	oral - capsule, sol'n, and tablet	Multiple	Prxn
Anisindione	58	FDA discontinued	tablet/oral	50mg	Discontinued
Adonitol	57.8
Rotenone	56.8
Clenbuterol hydrochloride	55.8
Thioguanine	55.3	FDA approved	tablet/oral	40mg	Prxn
2-Mercaptopyridine N-oxide	55.1
Asparaginase	54.5	FDA approved	vial	10,000 IU/vial	Prxn
Compactin	54.3
Bephenium hydroxy-naphthoate	53.7
Danthron	53.4	FDA approved	Discontinued (http://www.accessdata.fda.gov/cms_ia/importalert_186.html)
Gefitinib	53.4	FDA approved	tablet/oral	250mg	Prxn
Clove bud oil	53.3
Ticlopidine (hydrochloride)	52.9	FDA approved	tablet/oral	250mg	Prxn
Naproxen	52.7	FDA approved	oral - tablet/suspension	Multiple	Prxn
Strychnine	52.7
Phloretin	52.3
Guaiacol	52.1
Acemetacin	51.6
Clofoctol	51.5
Phenylacetaldehyde dimethylacetal	51.1
Nabumetone	50.7	FDA approved	tablet/oral	Multiple	Prxn
Hydroquinone	50.5	FDA approved	cream/topical	0.01, 0.05, 4%	Prxn
Benzalkonium chloride	50.1
Carbaryl	50
Melphalan (hydrochloride)	49.7	FDA approved	injectable	50mg base/vial	Prxn
Cyproterone	49.6
2'-Deoxycytidine	48.5
Benzoin tincture	48.4
Isopaglumic acid	48.3
Methoxamine (hydrochloride)	47.7	FDA approved	injectable	10-20mg/ml	Discontinued
Isothipendyl hydrochloride	47.6
Hycanthone	47.6
Iodophenpropit dihydrobromide	47.5
Berberine bisulfate	47.4
2,4-dinitrophenol	47.2
Lopinavir/Ritonavir	47.1	FDA approved	tablet/oral	Multiple	Approved
N-t-Boc-N-Methyl-D-alanine	47
Chembridge 5553790	47
Adenosine phosphate (adenosine)	46.8	FDA approved	injectable	3mg/ml	Prxn
Hexachlorophene	46.7	FDA approved	topical/sponge	480mg	Prxn
Pinocembrin	46.6
Disulfiram	46.5	FDA approved	tablet/oral	Multiple	Prxn
Despropionyl fentanyl	46.2
Aesculin	46
Idoxuridine	45.9	FDA approved	Opthalmic drops/sol'n	0.001	Prxn
Chloroxine	45.7	FDA discontinued	shampoo/topical	0.02	Disc
Atropine	45.6	FDA approved	injectable	2.9mg/ml	Disc
Helenien	45.6
5-fluoro-5'-deoxyuridine	45.4
Sulforaphane	45
Dequalinium chloride	44.5
Bleomycin (sulfate)	44.4	FDA approved	injectable	Multiple	Prxn
Glafenine	44.3
Casein enzymatic hydrolysate	44
Pyrrolidinedithiocarbamate	44
Primaquine (phosphate)	43.4	FDA approved	tablet/oral	15mg base	Prxn
Chaulmosulfone	43.4
Stearoylcarnitine chloride	42.9
Lovastatin	42.8	FDA approved	tablet/oral	Multiple	Prxn
Raloxifene hydrochloride	42.8	FDA approved	tablet/oral	60mg	None (tentative approval)
Cyclopiazonic acid	42.5
Thioridazine (hydrochloride)	42.1	FDA approved	oral/tablet (oral concentrate discontinued)	Multiple
Piperidolate hydrochloride	42.1
Phorbol myristate acetate	41.9
Drofenine hydrochloride	41.8
Sodium chromate	41.5	FDA approved	Injectable	100uCi/ml	Discontinued*	The risk of severe and fatal allergic-type reactions outweigh its benefit.
Azathioprine	41.4	FDA approved	Tablet/oral (injection discontinued)	50mg/vial, 2mg/ml, multiple	Prxn
Hydroxyzine (hydrochloride)	41.4	FDA approved	injectable	25-50mg/ml	Approved
Sulfamoxole	41.3
SKF 96365	41.2
Aldol	40.7
Prochlorperazine dimaleate salt	40.6	FDA approved	tablet/oral, injectable, rectal suppository	5-25mg, 5-10mg/ml	Disc, Disc, Prxn
Androsterone sodium sulfate	40.6
Prednisolone	40.5	FDA approved	tablet/syrup/oral	5mg, 3mg/ml	Prxn
Penicillin g (potassium)	40.5	FDA approved	Injectable	Multiple	Prxn
Ologomycin	40.5

## Sheet: By GI% - 5-5-11
Table S1. 314 Drugs with 40-100% inhibition
Drug Name	Growth inhibition (%)	FDA Classification		KEY
Gemcitabine (hydrochloride)	100	A		A	FDA approved for Oral/Injectable dosing
Actinomycin D (dactinomyocin)	99.7	A		B	Discontinued, previous approved for Oral/Injectable dosing
Doxorubicin (hydrochloride)	99.6	A		C	FDA approved for Topical or Suppository or Nasal Spray dosing or Other
Prazosin (hydrochloride)	99.5	A		D	Discontinued, previous approved for Topical or Suppository or Nasal Spray dosing
Mitoxantrone hydrochloride	99.5	A		E	Never FDA approved
Dactinomycin	99.3	A		F	Discontinued for safety reasons
Verteporfin	99.3	A		#	Tentative Approval
Thonzonium bromide	98.8	A		*	Available OTC
Cytarabine	98.8	A
Daunorubicin (hydrochloride)	98.7	A
Idarubicin (hydrochloride)	97.9	A
Topotecan (hydrochloride)	97.7	A
Rapamycin (rapamune/sirolimus)	97.5	A
Mycophenolic acid	95.6	A
Digoxin	94.7	A
Amifostine	92.5	A
Labetalol (hydrochloride)	91.8	A
Colchiceine (Colchicine)	90.3	A
Cladribine	88.9	A
Nicotinic Acid (Niacin)	88.2	A
Amantadine hydrochloride	87.9	A
Epirubicin (hydrochloride)	87.7	A
Hydroxyitraconazole (itraconazole)	86.2	A
Vinorelbine tartrate	85.4	A
Teniposide	83.9	A
Dopamine hydrochloride	83.6	A
Ketoprofen	83.2	A
Irinotecan hydrochloride trihydrate (irinotecan hydrochloride)	80.7	A
Metoprolol tartrate	80	A
Vincristine sulfate	78.6	A
Chloroquine diphosphate salt (chloroquine phosphate)	78	A
Tolbutamide	76.2	A
Docetaxel	75.7	A
Vinblastine sulfate	75.1	A
Colchicine	74.5	A
Nalbuphine (hydrochloride)	73.5	A
Naltrexone hydrochloride	71.5	A
Dipyridamole	71.4	A
Vigabatrin	71.3	A
Nelfinavir mesylate	71.1	A
Mechlorethamine HCL	71	A
Carboplatin	70	A
Paclitaxel (Abraxane)	70	A
Carmustine	69.8	A
Dapsone	66.3	A
Ribavirin	65.9	A
Trimilpramine maleate (trimipramine maleate)	65.5	A
Felbamate	65.5	A
Ivermectin	63.3	A
Etoposide	62.1	A
Carbinoxamine (maleate)	61.8	A
Prochlorperazine edisylate	61.5	A
Mercaptopurine	60.2	A
Clofazimine	59.4	A
Doxepin hydrochloride	58.2	A
Galantamine hydrobromide	58.2	A
Thioguanine	55.3	A
Asparaginase	54.5	A
Gefitinib	53.4	A
Ticlopidine (hydrochloride)	52.9	A
Naproxen	52.7	A
Nabumetone	50.7	A
Melphalan (hydrochloride)	49.7	A
Methoxamine (hydrochloride)	47.7	A
Lopinavir/Ritonavir	47.1	A
Disulfiram	46.5	A
Bleomycin (sulfate)	44.4	A
Primaquine (phosphate)	43.4	A
Lovastatin	42.8	A
Thioridazine (hydrochloride)	42.1	A
Azathioprine	41.4	A
Hydroxyzine (hydrochloride)	41.4	A
Prednisolone	40.5	A
Penicillin g (potassium)	40.5	A
Omeprazole	89.9	A*
Fluvastatin sodium	79.4	A#
Raloxifene hydrochloride	42.8	A#
Acetyldigitoxin	99	B
Cephradine	97.1	B
Plicamycin	96	B
Digitoxin	95.1	B
Iopanoic acid	92.2	B
Gallamine triethiodide	82.7	B
Oxyphencyclimine	71.6	B
Amodiaquine	60.3	B
Anisotropine methylbromide	59.6	B
Anisindione	58	B
Atropine	45.6	B
Prochlorperazine dimaleate salt	40.6	B, C
Podofilox	82.7	C
Chlorhexidine (gluconate)	82.3	C*
Ciclopirox olamine	71.6	C
Ipratroprium bromide (ipratropium bromide)	62.9	C
Pneumococcal 7-valent conjugate vaccine (Prevnar)	60.6	C
Hydroquinone	50.5	C
Adenosine phosphate (adenosine)	46.8	C
Hexachlorophene	46.7	C
Idoxuridine	45.9	C
Acrisorcin	99.5	D
Gentian violet	99.2	D
Gramicidin A	97.9	D
Pyrithione zinc	89.6	D
Suprofen methyl ester (suprofen)	74.9	D
Antazoline	69	D
Chloroxine	45.7	D
Pristimerin	100	E
Tubercidin	100	E
Quinacrine	100	E
Convallatoxin	100	E
Brij	100	E
Myrrh oil	100	E
Acriflavine	99.8	E
Gambogic acid	99.8	E
Brilliant Blue	99.8	E
Celastrol	99.7	E
Aminacrine	99.7	E
Triple dye	99.7	E
Aklavine hydochloride	99.7	E
Aminacrine	99.7	E
Chromomycin A3	99.6	E
Actinomycin C	99.6	E
Tilorone Analog R 9536-DA	99.5	E
Emetine	99.5	E
Malachite green	99.5	E
Tetrandrine	99.4	E
Triptonide	99.4	E
Camptothecin	99.4	E
Dithiazanine iodide	99.2	E
Cantharidin	99.2	E
Anisomycin	99.2	E
Proflavine hemisulfate salt hydrate	99.1	E
Brilliant green	99.1	E
Cetyltrimethyl	99.1	E
Cetylpyridinium	99	E
Tolonium chloride	98.9	E
Rutilantin	98.9	E
Strophanthin K	98.9	E
Ancitabine hydrochloride	98.8	E
Quinaldine blue	98.7	E
Nigericin sodium	98.3	E
Ipecac syrup	98.3	E
Puromycin	98.3	E
O-Phenanthroline	98.2	E
Triptolide	98.1	E
Strophanthidin	98	E
Geldanamycin	98	E
10-hydroxycamptothecin	97.8	E
Cetylpyridinium bromide monohydrate	97.7	E
Pyrivinium pamonate (Pyridinium pamoate)	97.6	E
Astemizole	97.3	E
Mebeverine hydrochloride	97.1	E
Azure A	97.1	E
Cyclocytidine HCL	97	E
Cetrimonium bromide	97	E
Methylglyoxal bis-(guanylhydrazone) dihydrochloride	96.8	E
Podophyllum resin	96.8	E
Peruvoside	96.8	E
Radicicol	96.8	E
Methyl violet 2B	96.7	E
Nile blue A	96.6	E
Neocuproine	96.5	E
Brefeldin A	96.1	E
Juniper tar	95.8	E
Stearyltrimethylammonium chloride	95.7	E
Ouabain	95.6	E
Diphenylcyclopropenone	95.4	E
Digitonin	94.9	E
Valinomycin	94.9	E
Cycloheximide	94.8	E
Bemegride (3-methyl-3-ethylglutarimide)	94.4	E
Cymarin	93.9	E
Lasalocid sodium	93.5	E
Periplocymarin	93.5	E
N(g)-nitro-L-arginine	93.3	E
Proscillaridin A	93.2	E
Birch tar oil rectified	92.7	E
Staurosporine	92.7	E
Benzododecinium chloride	92.3	E
Pyrogallin	92.2	E
Lanatoside C	92.1	E
Nerifolin	92.1	E
Ethacridine lactate	91.9	E
Triciribine	91.8	E
Hexadimethrine bromide	91.2	E
Tilorone dihydrochloride	91	E
Pyronin Y	90.4	E
Salinomycin sodium	90.4	E
Thiostrepton	90.3	E
3-aminopropanesulphonic acid	86.9	E
Domiphen bromide	86.9	E
Safranin O	86.6	E
Broxuridine	86.6	E
Dichlorodiphenyltrichlorethane	86.3	E
Crassin acetate	86.3	E
Homidium brimide	85.5	E
Chlorquinaldol	85.3	E
Monensin sodium	85	E
N-Ethylmaleimide	84.3	E
Rifamycin sv	84.1	E
Retinol	83.9	E
Basic fuchsin hydrochloride	83.4	E
Methylene blue hydrate	82.5	E
7-chloroethyltheophylline	81.9	E
Tomatine	81.8	E
Alexidine hydrochloride	81.4	E
Methylbenzethonium chloride	80.9	E
Alprenolol	80.7	E
Quercitrin	80.4	E
Diaziquone	80.4	E
Phenylmercuric acetate	80.2	E
Mebhydrolin naphthalene sulfonate	79.5	E
Aclarubicin	78.3	E
Coal tar	78.2	E
Althiazide	77.6	E
Thiomerosal	77.4	E
Patulin	77.3	E
Lipoic acid	76.7	E
Lawsone	76.4	E
Tilorone	75.9	E
Tioxolone	75.9	E
Nogalamycin	75.4	E
Estriol benzyl ether	75.2	E
Trichlormethine	75.2	E
Tyrothericin	75	E
Nefopam	74.8	E
Lithium acetate	74.2	E
Estradiol-3-sulfate	74	E
Thiram	73.6	E
Pyrromycin	73.6	E
Silibinin	73.6	E
Fenspiride	73.1	E
Sulfachlorpyridazine	73	E
Cinnamon oil	72.9	E
Vindesine	72.9	E
Demecolcine	72.4	E
Thiacetazone	71.4	E
Octopamine hydrochloride	71.1	E
DETC	70.5	E
Gitoxin	69.6	E
Perhexilline maleate	69.3	E
Fennel oil	69.3	E
Acetylglucosamine	68	E
Succinylsulfathazole	67.8	E
Retinyl acetate	67.7	E
Shikonin	67.6	E
Thiamphenicol	67.4	E
Acridine yellow	67.3	E
Guaiacwood oil	67.2	E
Cimicifugin	66.9	E
Ditiocarb	66.5	E
Oxybendazole	66.4	E
Adenosine-5'-diphosphate Disodium salt	66.4	E
5-Methyl-2'deoxycytidine	65.8	E
Methyl 7-deshydroxypyrogallin-4-carboxylate	65.4	E
Satraplatin	65.3	E
Phenylhydrazine	64.6	E
Fenbendazole	63.6	E
5-azacytidine	63.6	E
Methylbenzethonium chloride	62.7	E
Croton oil	62.6	E
Thymidine 5'-monophosphate	62.1	E
Miltefosine	62.1	E
Pararosaniline pamonete	61.5	E
Niguldipine	59.5	E
Curcumin	59	E
Metrifonate	59	E
Adonitol	57.8	E
Rotenone	56.8	E
Clenbuterol hydrochloride	55.8	E
2-Mercaptopyridine N-oxide	55.1	E
Compactin	54.3	E
Bephenium hydroxy-naphthoate	53.7	E
Clove bud oil	53.3	E
Strychnine	52.7	E
Phloretin	52.3	E
Guaiacol	52.1	E
Acemetacin	51.6	E
Clofoctol	51.5	E
Phenylacetaldehyde dimethylacetal	51.1	E
Benzalkonium chloride	50.1	E
Carbaryl	50	E
Cyproterone	49.6	E
2'-Deoxycytidine	48.5	E
Benzoin tincture	48.4	E
Isopaglumic acid	48.3	E
Isothipendyl hydrochloride	47.6	E
Hycanthone	47.6	E
Iodophenpropit dihydrobromide	47.5	E
Berberine bisulfate	47.4	E
2,4-dinitrophenol	47.2	E
N-t-Boc-N-Methyl-D-alanine	47	E
Chembridge 5553790	47	E
Pinocembrin	46.6	E
Despropionyl fentanyl	46.2	E
Aesculin	46	E
Helenien	45.6	E
5-fluoro-5'-deoxyuridine	45.4	E
Sulforaphane	45	E
Dequalinium chloride	44.5	E
Glafenine	44.3	E
Casein enzymatic hydrolysate	44	E
Pyrrolidinedithiocarbamate	44	E
Chaulmosulfone	43.4	E
Stearoylcarnitine chloride	42.9	E
Cyclopiazonic acid	42.5	E
Piperidolate hydrochloride	42.1	E
Phorbol myristate acetate	41.9	E
Drofenine hydrochloride	41.8	E
Sulfamoxole	41.3	E
SKF 96365	41.2	E
Aldol	40.7	E
Androsterone sodium sulfate	40.6	E
Ologomycin	40.5	E
Sodium chromate	41.5	F

## Sheet: Only FDA app&disc - 4-22-11
Drugs	Growth inhibition (%)	FDA Status* (ANK 4/22/11)	Dosage Form/Route (ANK 4/22/11)		KEY
Gemcitabine (hydrochloride)	100	Approved	I		I	Injection
Actinomycin D (dactinomyocin)	99.7	Approved	I		O	Oral
Doxorubicin (hydrochloride)	99.6	Approved	I		T	Topical/opthalmic
Prazosin (hydrochloride)	99.5	Approved	O		S	Suppository
Acrisorcin	99.5	Discontinued	T		N	Nasal/inhaled spray
Mitoxantrone hydrochloride	99.5	Approved	I		*	Discontinued for safety reasons
Dactinomycin	99.3	Approved	I
Verteporfin	99.3	Approved	I
Gentian violet	99.2	Discontinued	S
Acetyldigitoxin	99	Discontinued	O
Thonzonium bromide	98.8	Approved	O
Cytarabine	98.8	Approved	I
Daunorubicin (hydrochloride)	98.7	Approved	I
Gramicidin A	97.9	Approved	T
Idarubicin (hydrochloride)	97.9	Approved	I
Topotecan (hydrochloride)	97.7	Approved	I, O
Cetylpyridinium bromide monohydrate	97.7	?	Couldn't find
Pyrivinium pamonate (Pyridinium pamoate)	97.6	?	Couldn't find
Rapamycin (rapamune/sirolimus)	97.5	Approved	O
Cephradine	97.1	Discontinued	O
Plicamycin	96	Discontinued	I
Mycophenolic acid	95.6	Approved	O
Digitoxin	95.1	Discontinued	I
Digoxin	94.7	Approved	I, O
Chlormadinone acetate	94.1	Discontinued*
Amifostine	92.5	Approved	I
Iopanoic acid	92.2	Discontinued	O
Labetalol (hydrochloride)	91.8	Approved	I, O
Colchiceine (Colchicine)	90.3	Approved	O
Omeprazole	89.9	Approved (OTC too)	O
Pyrithione zinc	89.6	Discontinued	T
Cladribine	88.9	Approved	I
Nicotinic Acid (Niacin)	88.2	Approved	O
Amantadine hydrochloride	87.9	Approved	O
Epirubicin (hydrochloride)	87.7	Approved	I
Hydroxyitraconazole (itraconazole)	86.2	Approved	O
Vinorelbine tartrate	85.4	Approved	I
Teniposide	83.9	Approved	I
Dopamine hydrochloride	83.6	Approved	I
Ketoprofen	83.2	Approved	O
Podofilox	82.7	Approved	T
Gallamine triethiodide	82.7	Discontinued	I
Chlorhexidine (gluconate)	82.3	Approved (OTC too)	T
Irinotecan hydrochloride trihydrate (irinotecan hydrochloride)	80.7	Approved	I
Metoprolol tartrate	80	Approved	I, O
Fluvastatin sodium	79.4	Tentative approval	O
Taxol (paclitaxel brand name)	79	Discontinued	I
Vincristine sulfate	78.6	Approved	I
Chloroquine diphosphate salt (chloroquine phosphate)	78	Approved	O
Tolbutamide	76.2	Approved	O
Docetaxel	75.7	Approved	I
Vinblastine sulfate	75.1	Approved	I
Suprofen methyl ester (suprofen)	74.9	Discontinued	T
Colchicine	74.5	Approved	O
Nalbuphine (hydrochloride)	73.5	Approved	I
Ciclopirox olamine	71.6	Approved	T
Oxyphencyclimine	71.6	Discontinued	O
Naltrexone hydrochloride	71.5	Approved	O
Dipyridamole	71.4	Approved	I, O
Vigabatrin	71.3	Approved	O
Nelfinavir mesylate	71.1	Approved	O
Mechlorethamine HCL	71	Approved	I
Carboplatin	70	Approved	I
Paclitaxel (Abraxane) (Taxol is discontinued)	70	Approved	I
Carmustine	69.8	Approved	I
Antazoline	69	Discontinued	T
Dapsone	66.3	Approved	O
Ribavirin	65.9	Approved	O
Trimilpramine maleate (trimipramine maleate)	65.5	Approved	O
Felbamate	65.5	Approved	O
Ivermectin	63.3	Approved	O
Ipratroprium bromide (ipratropium bromide)	62.9	Approved	N
Etoposide	62.1	Approved	I, O
Carbinoxamine (maleate)	61.8	Approved	O
Prochlorperazine edisylate	61.5	Approved	I, O
Pneumococcal 7-valent conjugate vaccine (Prevnar)	60.6	Approved	I
Amodiaquine	60.3	Discontinued	O
Mercaptopurine	60.2	Approved	O
Anisotropine methylbromide	59.6	Discontinued	O
Clofazimine	59.4	Approved	O
Doxepin hydrochloride	58.2	Approved	O
Galantamine hydrobromide	58.2	Approved	O
Anisindione	58	Discontinued	O
Thioguanine	55.3	Approved	O
Asparaginase	54.5	Approved	I
Danthron	53.4	Discontinued*
Gefitinib	53.4	Approved	O
Ticlopidine (hydrochloride)	52.9	Approved	O
Naproxen	52.7	Approved	O
Nabumetone	50.7	Approved	O
Hydroquinone	50.5	Approved	T
Melphalan (hydrochloride)	49.7	Approved	I
Methoxamine (hydrochloride)	47.7	Approved	I
Lopinavir/Ritonavir	47.1	Approved	O
Adenosine phosphate (adenosine)	46.8	Approved	I
Hexachlorophene	46.7	Approved	T
Disulfiram	46.5	Approved	O
Idoxuridine	45.9	Approved	T
Chloroxine	45.7	Discontinued	T
Atropine	45.6	Discontinued	I
Bleomycin (sulfate)	44.4	Approved	I
Primaquine (phosphate)	43.4	Approved	O
Lovastatin	42.8	Approved	O
Raloxifene hydrochloride	42.8	Tentative approval	O
Thioridazine (hydrochloride)	42.1	Approved	O
Sodium chromate	41.5	Discontinued*	I	The risk of severe and fatal allergic-type reactions outweigh its benefit.
Azathioprine	41.4	Approved (Injection Discontinued)	O
Hydroxyzine (hydrochloride)	41.4	Approved	I
Prochlorperazine dimaleate salt	40.6	Approved for recal suppository, Discontinued for tablet/injection	I, O, S
Prednisolone	40.5	Approved	O
Penicillin g (potassium)	40.5	Approved	I

## Sheet: Key Code - 4-22-11
Drugs	Growth inhibition (%)	Key	FDA Status* (ANK 4/22/11)	Why discontinued?	Dosage Form/Route (ANK 4/22/11)		KEY
Gemcitabine (hydrochloride)	100	A	Approved		I		A	FDA approved for Oral/Injectable dosing
Actinomycin D (dactinomyocin)	99.7	A	Approved		I		B	Discontinued, previous approved for Oral/Injectable dosing
Doxorubicin (hydrochloride)	99.6	A	Approved		I		C	FDA approved for Topical or Suppository or Nasal Spray dosing
Prazosin (hydrochloride)	99.5	A	Approved		O		D	Discontinued, previous approved for Topical or Suppository or Nasal Spray dosing
Acrisorcin	99.5	D	Discontinued	?	T		#	Tentative Approval
Mitoxantrone hydrochloride	99.5	A	Approved		I		*	Available OTC
Dactinomycin	99.3	A	Approved		I		I removed those I know were discontinued because of safety reasons
Verteporfin	99.3	A	Approved		I		I also removed those that I couldn't find FDA approval/discontinued information for
Gentian violet	99.2	D	Discontinued	questionable efficacy	S
Acetyldigitoxin	99	B	Discontinued	?	O
Thonzonium bromide	98.8	A	Approved		O
Cytarabine	98.8	A	Approved		I
Daunorubicin (hydrochloride)	98.7	A	Approved		I
Gramicidin A	97.9	D	Approved		T
Idarubicin (hydrochloride)	97.9	A	Approved		I
Topotecan (hydrochloride)	97.7	A	Approved		I, O
Rapamycin (rapamune/sirolimus)	97.5	A	Approved		O
Cephradine	97.1	B	Discontinued	?	O
Plicamycin	96	B	Discontinued	Manufacturer decision	I
Mycophenolic acid	95.6	A	Approved		O
Digitoxin	95.1	B	Discontinued	?	I
Digoxin	94.7	A	Approved		I, O
Amifostine	92.5	A	Approved		I
Iopanoic acid	92.2	B	Discontinued	?	O
Labetalol (hydrochloride)	91.8	A	Approved		I, O
Colchiceine (Colchicine)	90.3	A	Approved		O
Omeprazole	89.9	A*	Approved (OTC too)		O	*
Pyrithione zinc	89.6	D	Discontinued	now oTC?	T
Cladribine	88.9	A	Approved		I
Nicotinic Acid (Niacin)	88.2	A	Approved		O
Amantadine hydrochloride	87.9	A	Approved		O
Epirubicin (hydrochloride)	87.7	A	Approved		I
Hydroxyitraconazole (itraconazole)	86.2	A	Approved		O
Vinorelbine tartrate	85.4	A	Approved		I
Teniposide	83.9	A	Approved		I
Dopamine hydrochloride	83.6	A	Approved		I
Ketoprofen	83.2	A	Approved		O
Podofilox	82.7	C	Approved		T
Gallamine triethiodide	82.7	B	Discontinued	Manufacturer decision	I
Chlorhexidine (gluconate)	82.3	C*	Approved (OTC too)		T	*
Irinotecan hydrochloride trihydrate (irinotecan hydrochloride)	80.7	A	Approved		I
Metoprolol tartrate	80	A	Approved		I, O
Fluvastatin sodium	79.4	A#	Tentative approval		O
Taxol (paclitaxel brand name)	79	B	Discontinued	Manufacturer decision (**Federal Register determination that product was not discontinued or withdrawn for safety or efficacy reasons** )	I	<--- can use Abraxane (another brand name for paclitaxel), but why is there a ~9% difference between taxol and paclitaxel if they are the same compound?
Vincristine sulfate	78.6	A	Approved		I
Chloroquine diphosphate salt (chloroquine phosphate)	78	A	Approved		O
Tolbutamide	76.2	A	Approved		O
Docetaxel	75.7	A	Approved		I
Vinblastine sulfate	75.1	A	Approved		I
Suprofen methyl ester (suprofen)	74.9	D	Discontinued	?	T
Colchicine	74.5	A	Approved		O
Nalbuphine (hydrochloride)	73.5	A	Approved		I
Ciclopirox olamine	71.6	C	Approved		T
Oxyphencyclimine	71.6	B	Discontinued	?	O
Naltrexone hydrochloride	71.5	A	Approved		O
Dipyridamole	71.4	A	Approved		I, O
Vigabatrin	71.3	A	Approved		O
Nelfinavir mesylate	71.1	A	Approved		O
Mechlorethamine HCL	71	A	Approved		I
Carboplatin	70	A	Approved		I
Paclitaxel (Abraxane) (Taxol is discontinued)	70	A	Approved	Paclitaxel available under "ABRAXANE" brand name	I
Carmustine	69.8	A	Approved		I
Antazoline	69	D	Discontinued	?	T
Dapsone	66.3	A	Approved		O
Ribavirin	65.9	A	Approved		O
Trimilpramine maleate (trimipramine maleate)	65.5	A	Approved		O
Felbamate	65.5	A	Approved		O
Ivermectin	63.3	A	Approved		O
Ipratroprium bromide (ipratropium bromide)	62.9	C	Approved		N
Etoposide	62.1	A	Approved		I, O
Carbinoxamine (maleate)	61.8	A	Approved		O
Prochlorperazine edisylate	61.5	A	Approved		I, O
Pneumococcal 7-valent conjugate vaccine (Prevnar)	60.6	A	Approved		I
Amodiaquine	60.3	B	Discontinued	?	O
Mercaptopurine	60.2	A	Approved		O
Anisotropine methylbromide	59.6	B	Discontinued	?	O
Clofazimine	59.4	A	Approved		O
Doxepin hydrochloride	58.2	A	Approved		O
Galantamine hydrobromide	58.2	A	Approved		O
Anisindione	58	B	Discontinued	?	O
Thioguanine	55.3	A	Approved		O
Asparaginase	54.5	A	Approved		I
Gefitinib	53.4	A	Approved		O
Ticlopidine (hydrochloride)	52.9	A	Approved		O
Naproxen	52.7	A	Approved		O
Nabumetone	50.7	A	Approved		O
Hydroquinone	50.5	C	Approved		T
Melphalan (hydrochloride)	49.7	A	Approved		I
Methoxamine (hydrochloride)	47.7	A	Approved		I
Lopinavir/Ritonavir	47.1	A#	Approved		O
Adenosine phosphate (adenosine)	46.8	A	Approved		I
Hexachlorophene	46.7	C	Approved		T
Disulfiram	46.5	A	Approved		O
Idoxuridine	45.9	C	Approved		T
Chloroxine	45.7	D	Discontinued	?	T
Atropine	45.6	B	Discontinued	?	I
Bleomycin (sulfate)	44.4	A	Approved		I
Primaquine (phosphate)	43.4	A	Approved		O
Lovastatin	42.8	A	Approved		O
Raloxifene hydrochloride	42.8	A#	Tentative approval		O
Thioridazine (hydrochloride)	42.1	A	Approved		O
Azathioprine	41.4	A	Approved (Injection Discontinued)		O
Hydroxyzine (hydrochloride)	41.4	A	Approved		I
Prochlorperazine dimaleate salt	40.6	B, C	Approved for recal suppository, Discontinued for tablet/injection		I, O, S
Prednisolone	40.5	A	Approved		O
Penicillin g (potassium)	40.5	A	Approved		I
