# Supplementary material for: Personalized Chemotherapy Profiling Using Cancer Cell Lines from Selectable Mice
Source: Oxford University Press journal article supplement (doi:10.1158/1078-0432.ccr-12-2127), 2013-01-23
Supplement: 10780432ccr122127-sup-tab2.xlsx [file 10780432ccr122127-sup-tab2.xlsx]

## Sheet: Sheet1
Table S2. Response of Panc502 to 125 anti-neoplastic drugs
Drug	Average % growth inhibition at 10uM final concentration	subclassification/ description
Gemcitabine	100	Antineoplastic antimetabolites/DNA synthesis inhibitor
Pristimerin	100	Antineoplastic terpenoids/Proteasome inhibitor
Actinomycin D	99.7013	Antineoplastic antibiotics/RNA synthesis inhibitor
Actinomycin C (Cactinomycin)	99.6462	Antineoplastic antibiotics/RNA synthesis inhibitor
Chromomycin A3	99.6462	Antineoplastic antibiotics/RNA synthesis inhibitor
Doxorubicin	99.6358	Antineoplastic anthracyclines/DNA intercalator, topoisomerase II inhibitor
Mitoxantrone hydrochloride	99.502	Antineoplastic anthracenediones/DNA intercalator, topoisomerase II inhibitor
Triptonide	99.4267	Antineoplastic terpenoids
Camptothecin	99.4	Antineoplastics/Topoisomerase I inhibitor
Ancitabine hydrochloride	98.8485	Antineoplastic antimetabolites/DNA synthesis inhibitor
Cytarabine (Cytosine 1-b-D-arabinofuranoside)	98.7545	Antineoplastic antimetabolites/DNA synthesis inhibitor
Quinaldine blue (Pinacyanol chloride)	98.7383	Unknown
Daunorubicin	98.7026	Antineoplastic anthracyclines/DNA intercalator, topoisomerase II inhibitor
Puromycin	98.3433	Antineoplastic aminonucleosides/Protein synthesis inhibitor
Idarubicin	97.8882	Antineoplastic anthracyclines/DNA intercalator, topoisomerase II inhibitor
10-hydroxycamptothecin	97.8	Antineoplastics/Topoisomerase I inhibitor
Topotecan	97.709	Antineoplastics/Topoisomerase I inhibitor
Plicamycin (Mithramycin A)	96.0371	Antineoplastic antibiotics/RNA synthesis inhibitor
Cycloheximide	94.799	Antineoplastic antibiotics/Protein synthesis inhibitor
Amifostine	92.5468	Radiation-protective agents
Triciribine	91.804	Antineoplastic nucleoside analogues/Akt signaling inhibitor
Cladribine (2-chloro,2-deoxyadenosine)	88.9092	Antineoplastic antimetabolites/DNA synthesis inhibitor
Epirubicin	87.7492	Antineoplastic anthracyclines/DNA intercalator, topoisomerase II inhibitor
Broxuridine (5-Bromouracil deoxyriboside, 5-bromo-2'-deoxyuridine)	86.6134	Antineoplastic nucleoside analogues/Radiosensitizer
Vinorelbine tartrate	85.3582	Antineoplastic vinca alkaloids/Tubulin polymerization inhibitor
Teniposide	83.9037	Antineoplastics/Topoisomerase II inhibitor
Irinotecan hydrochloride trihydrate	80.732	Antineoplastics/Topoisomerase I inhibitor
Diaziquone	80.4275	Antineoplastics/Alkylating agent
Taxol	78.9912	Antineoplastic taxanes/Tubulin stabilizing agent
Vincristine sulfate	78.5526	Antineoplastic vinca alkaloids/Tubulin polymerization inhibitor
Aclarubicin	78.2709	Antineoplastic anthracyclines/DNA intercalator, topoisomerase II inhibitor
Docetaxel	75.7413	Antineoplastic taxanes/Tubulin stabilizing agent
Nogalamycin	75.4163	Antineoplastic anthracyclines/DNA intercalator, topoisomerase II inhibitor
Trichlormethine (Trimustine)	75.2238	Antineoplastics/Cytostatic agent
Vindesine	72.8633	Antineoplastic vinca alkaloids/Tubulin polymerization inhibitor
Demecolcine	72.4355	Antineoplastic alkaloids/Tubulin polymerization inhibitor
Mechlorethamine HCL	71.0427	Antineoplastics/Alkylating agent
Carboplatin (Diamine(1,1-cyclobutane-dicarboxylato)platinum(II))	70.038	Antineoplastics/Alkylating-like agent
Paclitaxel	69.994	Antineoplastic taxanes/Tubulin stabilizing agent
Carmustine	69.8136	Antineoplastics/Alkylating agent
Satraplatin	65.2928	Antineoplastics/Alkylating-like agent
5-azacytidine	63.5793	Antineoplastics/DNA methylation inhibitor
Miltefosine (hexadecyl phosphocholine)	62.1473	Antineoplastic alkyl-phosphocholines/Cell membrane targeting drug
Etoposide	62.069	Antineoplastics/Topoisomerase II inhibitor
Thioguanine (2-amino,6-mercaptopurine)	55.3263	Antineoplastic antimetabolites/DNA synthesis inhibitor
Asparaginase	54.5443	Antineoplastic bacterial enzyme/Protein synthesis inhibitor
Gefitinib (Iressa)	53.352	Antineoplastic anilinoquinazolines/EGF receptor tyrosine kinase inhibitor
Melphalan	49.6846	Antineoplastics/Alkylating agent
Bleomycin	44.4132	Antineoplastic antibiotics/DNA synthesis inhibitor
Thiotepa (Triethylenethiophosphoramide)	38.3524	Antineoplastics/Alkylating agent
Decitabine (5-aza-2-deoxycytidine)	37.3798	Antineoplastic antimetabolites/DNA synthesis inhibitor
Amsacrine	34.393	Antineoplastic aminoacridine/DNA intercalator, topoisomerase II inhibitor
Oxaliplatin	32.4051	Antineoplastics/Alkylating-like agent
Fludarabine (2-fluoroadenine-arabinfuranose)	31.2103	Antineoplastic antimetabolites/DNA synthesis inhibitor
Mitotane (1-2-Chlorophenyl-1-4-chlorophenyl-2,2-dichloroethane)	28.8591	Antineoplastics/Anti-adrenocorticoids
Cepharanthine	27.9448	Antineoplastic biscoclaurine alkaloids/Anti-inflammatory agent
Mitobronitol (1,6-Dibromo-1,6-dideoxy-D-mannitol)	26.8114	Antineoplastics/Alkylating agent
Pipobroman	24.3166	Antineoplastics/Alkylating agent
Cyclophosphamide hydrate	24.1728	Antineoplastics/Alkylating agent
Altretamine	23.1348	Antineoplastics/Alkylating agent
Thiourea	21.1295	Unknown
alpha1-acid glycoprotein	20.8853	Unknown
Chlorambucil	20.388	Antineoplastics/Alkylating agent
Nimustine	19.9425	Antineoplastics/Alkylating agent
Phenanthrene	19.7311	Unknown
6-Mercaptopurine monohydrate	18.2268	Antineoplastic antimetabolites/DNA synthesis inhibitor
Triethylene glycol	16.7959	Unknown
Tamoxifen	15.7444	Antineoplastic hormonal agents/Selective estrogen receptor modulator
Semustine	15.023	Antineoplastics/Alkylating agent
Fenretinide (N-(4-Hydroxyphenyl)retinamide)	14.7309	Antineoplastic retinol analogues/Retinoic acid receptor agonist
Hydroxyurea	14.3554	Antineoplastic antimetabolites/DNA synthesis inhibitor
(+-)-p-Aminoglutethimide	14.0569	Antineoplastic hormonal agents/Aromatase inhibitor
Hydroxyflutamide (2-Hydroxy-flutamide)	13.8255	Antineoplastic hormonal agents/Antiandrogen
Cisplatin	13.1706	Antineoplastics/Alkylating-like agent
Ifosfamide	13.0485	Antineoplastics/Alkylating agent
Flutamide	12.7479	Antineoplastic hormonal agents/Antiandrogen
Toremifene	12.3966	Antineoplastic hormonal agents/Selective estrogen receptor modulator
Temozolomide	11.8182	Antineoplastics/Alkylating agent
Leuprolide	11.6863	Antineoplastic hormonal agents/Gonadotropin-releasing hormone (GnRH) receptor agonist
Sulindac sulfone	11.5341	Antineoplastics/Nonsteroidal anti-inflammatory drug (NSAID)
Betulinic acid	11.4673	Antineoplastic triterpens
Triptorelin ([D-Trp6]-Luteinizing hormone releasing hormone)	11.0034	Antineoplastic hormonal agents/Gonadotropin-releasing hormone (GnRH) receptor agonist
Diethylstilbesterol	10.9372	Antineoplastic hormonal agents/Nonsteroidal estrogen
Tenuazonic acid	10.7597	Antineoplastic antibiotics/Protein synthesis inhibitor
Norcantharidin	9.98099	Antineoplastics/Protein phosphatase 1 and 2A inhibitor
Eflornithine (DL-alpha-Difluoromethylornithine hydrochloride)	9.8444	Antineoplastic ornithine compounds/Ornithine decarboxylase inhibitor
Solasodine	9.42442	Antineoplastic steroidal alkaloids
Formestane	9.39877	Antineoplastic hormonal agents/Aromatase inhibitor
Etanidazole	9.07544	Antineoplastics/Radiosensitizer/Glutathione transferase inhibitor
Streptozocin	9.02256	Antineoplastics/Alkylating agent
Fumagillone	8.94656	Antineoplastic antiangiogenic agents/Methionine aminopeptidase 2 inhibitor
Exemestane	8.8935	Antineoplastic hormonal agents/Aromatase inhibitor
Gold(III) chloride trihydrate	8.78819	Antineoplastic Gold(III) compounds
Alitretinoin (9-cis-retinoic acid)	8.49681	Antineoplastic retinoids/Retinoic acid receptor agonist
Monocrotaline	7.03796	Unknown
6-Diazo-5-oxo-L-norleucine	6.655	Antineoplastic antibiotics/Glutamine antagonist
Melengestrol acetate	6.35349	Antineoplastic hormonal agents/Progestational steroid
Sulindac	5.55944	Antineoplastics/Nonsteroidal anti-inflammatory drug (NSAID)
Histamine	4.48737	Antineoplastic immunomodulators
Procarbazine HCl	3.7479	Antineoplastics/Protein synthesis inhibitor/Alkylating agent
Gallium (III) nitrate hydrate	3.47889	Antineoplastics/Osteoclast-mediated calcium resorption inhibitor/Iron transport inhibitor
Lonidamine	3.4004	Antineoplastics/Lactate transport inhibitor
Buserelin	3.16753	Antineoplastic hormonal agents/Gonadotropin-releasing hormone (GnRH) receptor agonist
Urethane	3.12319	Unknown
Samarium(III) acetate hydrate	1.56759	Unknown
1,2-dimethylhydrazine hydrochloride	1.55625	Unknown
Juglone	1.05022	Antineoplastic natural toxin/Peptidyl-prolyl isomerase inhibitor
Nilutamide	-0.680713	Antineoplastic hormonal agents/Antiandrogen
Busulfan	-1.56059	Antineoplastics/Alkylating agent
Aminovulinic acid hydrochloride	-1.93335	Antineoplastic photosensitizer
Letrozole	-2.11138	Antineoplastic hormonal agents/Aromatase inhibitor
Goserelin acetate	-2.26603	Antineoplastic hormonal agents/Gonadotropin-releasing hormone (GnRH) receptor agonist
Phenylbutyric acid (Chlorambucil)	-3.04722	Antineoplastics/Alkylating agent
Arsenic trioxide (Sodium meta-arsenite)	-4.68347	Antineoplastics arsenic compounds/PML-RARa fusion protein disruptor
Tamsulosin HCl	-6.5862	Antineoplastic sulfonamides/α1-adrenoreceptor antagonist
Strontium chloride hexahydrate	-8.42499	Antineoplastic radiation sources
Anthracene	-9.09488	Unknown
Dacarbazine	-15.8896	Antineoplastics/Alkylating agent
TNP-470	-20.296	Antineoplastic antiangiogenic agents/Methionine aminopeptidase 2 inhibitor
Lomustine	-21.1868	Antineoplastics/Alkylating agent
Tegafur (Ftorafur)	-29.5706	Antineoplastic antimetabolites/DNA synthesis inhibitor
Fluorouracil	-62.3069	Antineoplastic antimetabolites/DNA synthesis inhibitor
Methotrexate	-140.223	Antineoplastic antimetabolites/Antifolate/DNA synthesis inhibitor
Mitomycin C	-163.038	Antineoplastics/Alkylating agent
Carmofur	-164.927	Antineoplastic antimetabolites/DNA synthesis inhibitor
Line signifies the break between active drugs and inactive drugs
